# Supplementary material for: Effects of the sliaa9 Mutation on Shoot Elongation Growth of Tomato Cultivars
Source: PubMed Central journal article supplement (PMC8173035; doi:10.3389/fpls.2021.627832), 2021-05-20
Supplement: Data_Sheet_1.pdf [file Data_Sheet_1.pdf]

**Table S1. Primers used in this study.**

| primer name                                                            | sequences (5'- 3')                                         | PCR products             |
|------------------------------------------------------------------------|------------------------------------------------------------|--------------------------|
| <b>PCR-RFLP of the target region for <i>SlIAA9</i></b>                 |                                                            |                          |
| SlIAA9_F27-52                                                          | GGAGGAGGAGGGCCAGAGTAATGTAA                                 | 349 bp                   |
| SlIAA9_R375-348                                                        | GTTGCCACTAACTACTGTTTTCTGCGAT                               |                          |
| <b>Cloning of the target region by SLiCE method</b>                    |                                                            |                          |
| SLiCE_IAA9_F27-52                                                      | ACCCGGGGGCGCGCCGGATCGGAGGAGGAGGGCCAGAGTAATGTAA             | 389 bp                   |
| SLiCE_IAA9_R375-348                                                    | TCTAGACTTAATTAAGGATCGTGGCCACTAACTACTGTTTTCTGCGAT           |                          |
| <b>Generation of DIG-Labeled Probes for Southern blot</b>              |                                                            |                          |
| Southern_Probe_gRNA_Fw                                                 | AAGCTTCGTTGAACAACGGAAC                                     | 624 bp                   |
| Southern_Probe_gRNA_Rv                                                 | AACGAAGAGAAAACCCAGAAAT                                     |                          |
| Southern_Probe_AtCas9_Fw                                               | GCAGCTCAAAGAGGATTACTTCA                                    | 481 bp                   |
| Southern_Probe_AtCas9_Rv                                               | CTCATGGAGACTATCACCCGTGC                                    |                          |
| Southern_Probe_LHCB_Fw                                                 | GGTGAATTCCTGGTACTACGGGTG                                   | 430 bp                   |
| Southern_Probe_LHCB_Rv                                                 | TCTCCTTACCTTGAGCTCAGCAA                                    |                          |
| <b>1st PCR primer for the off-target in next-generation sequencing</b> |                                                            |                          |
| MiSeq500_IAA9_off1_Fw                                                  | ACACTCTTCCCTACACGACGCTCTCCGATCTAGTCTTTTTGTTGTTCTCAGCATC    | 487 bp                   |
| MiSeq500_IAA9_off1_Rv                                                  | GTGACTGGAGTTCAGACGTGTGCTCTCCGATCTGTAGATTTGGACAGTTCTTTGAAGC |                          |
| <b>PCR detection of T-DNA regions of CRISPR-Cas9 expression vector</b> |                                                            |                          |
| M13Uni-100                                                             | GATCGGTGCGGGCCTCTTCGCTATT                                  | ① RB-AtU6-26, 209bp      |
| AtU6-26_+62Rv                                                          | GCTAAGAAGAATGATGATTGTGC                                    |                          |
| Southern_probe_gRNA_Fw                                                 | AAGCTTCGTTGAACAACGGAAC                                     | ② gRNA, 624bp            |
| Southern_probe_gRNA_Rv                                                 | AACGAAGAGAAAACCCAGAAAT                                     |                          |
| gRNA_seqF2                                                             | GTTTTAGAGCTAGAAATAGCAA                                     | ③ gRNA-pro-Cas9, 1150bp  |
| At_Cas9_115-96Rv                                                       | CGGTGTTTCCGAGAACCTTG                                       |                          |
| Southern_probe_AtCas9_Fw                                               | GCAGCTCAAAGAGGATTACTTCA                                    | ④ Cas9, 481bp            |
| Southern_probe_AtCas9_Rv                                               | CTCATGGAGACTATCACCCGTGC                                    |                          |
| AtCas9_Seq3600_F                                                       | ATCTCATCATCAAGCTCCCAAAG                                    | ⑤ Cas9-NLS-2A-GFP, 735bp |
| GFP_Nter_SeqR1                                                         | TGAACAGCTCCTCGCCCTTGCTCA                                   |                          |
| GFP_Nter_seqF1                                                         | GTGAGCAAGGGCGAGGAGCTGTTCA                                  | ⑥ GFP, 824bp             |
| T18.2_seqR1                                                            | AAGCCACAAATTCATAACACAACAAGCCA                              |                          |
| T18.2_seqF2                                                            | TGGCTTGTTGTGTTATGAATTTGTGGCTT                              | ⑦ ter-Km, 1511bp         |
| 2301-Km_seqR1                                                          | TTCGCCCAATAGCAGCCAGTCCCTT                                  |                          |
| 35S-58                                                                 | CCCACTATCCTTCGCAA                                          | ⑧ Km, 935bp              |
| 2301-Km_seqR2                                                          | GTCCCCTCAGAAGAAGCTCGTCAAGA                                 |                          |
| 2300-Km_SeqF3                                                          | CGCTATCAGGACATAGCGTTGGCTAC                                 | ⑨ Km-LB, 621 bp          |
| LB_-68Rv                                                               | TTAATGTACTGAATTAACGCCGAAT                                  |                          |

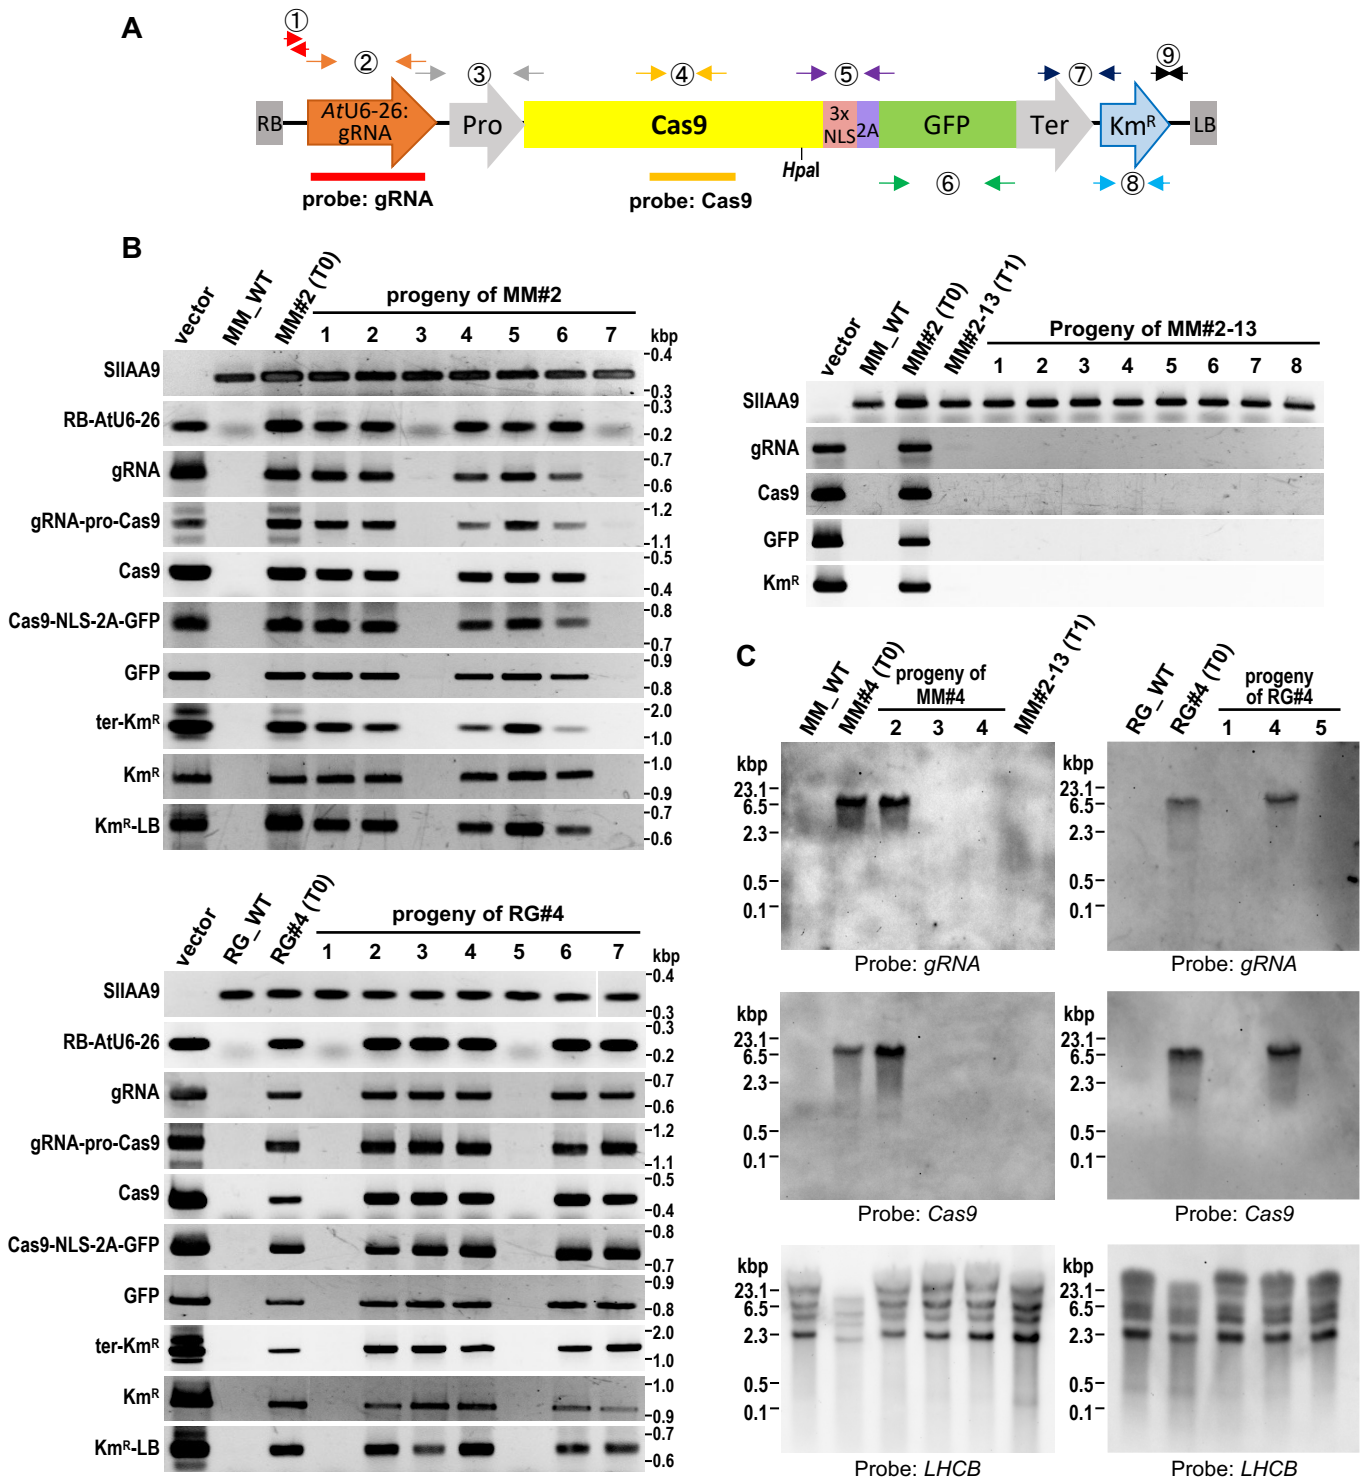

**Figure S1. Isolation of null-segregants in the T1 and T2 progeny of *sliaa9* mutants.**

(A) Structure of T-DNA regions of CRISPR-Cas9 expression vector and primer sites. In the pEgP237-2A-GFP vector, the 2 × *CaMV35S* promoter with omega enhancer sequence was used for *Cas9* expression. U6-26: Arabidopsis *U6 snRNA-26* promoter, gRNA: gRNA sequence, AtCas9; codon-optimized SpCas9 for *Arabidopsis thaliana*, NLS: nuclear localization signal, 2A; 2A self-cleavage peptide, Ter: Arabidopsis *hsp18.2* terminator, Km<sup>R</sup>; kanamycin resistance gene *NPTII*, RB: right border of T-DNA, LB: left border of T-DNA. Arrows with numbers represent the PCR primer locations for detection of T-DNA regions in *sliaa9* mutants. The probe regions for *gRNA* and *Cas9* used in Southern blot analysis are also indicated. ①; RB-AtU6-26, ②; gRNA, ③; gRNA-pro-Cas9, ④; Cas9, ⑤; Cas9-NLS-2A-GFP, ⑥; GFP, ⑦; ter-Km<sup>R</sup>, ⑧; Km<sup>R</sup>, ⑨; Km<sup>R</sup>-LB.

(B) Detection of T-DNA insertion in *sliaa9* T1 (MM#2-1 - MM#2-7 and RG#4-1 - RG#4-7) (left) and T2 (MM#2-13-1 - #2-13-8) (right) plants by PCR. MM#2, RG#4, and MM#2-13 are their parental plants, respectively. Each primer set is shown in (A) and Table S1. MM; Moneymaker, RG; Rio Grande. The *SIIAA9* gene was used as an endogenous control. # numbers; individual lines.

(C) Southern blot analysis was performed to isolate null-segregants of *sliaa9* mutants. DIG-labeled *gRNA* and *Cas9* probes were used to detect T-DNA insertion in *HpaI*-digested genomic DNA of *sliaa9* mutants. The *LHC8* gene was used as an endogenous control.

On target: GAGCTCAGGCTCGGTCTACCTGG  
Off target: TATATCATGCTCGGTCTGCCAGG

| Line No.    | mutation frequencies* |
|-------------|-----------------------|
| MM_WT       | 11/11700 (0.09%)      |
| MM#2 (T0)   | 12/10379 (0.12%)      |
| RG_WT       | 2/1396 (0.14%)        |
| RG#4 (T0)   | 2/2594 (0.08%)        |
| RG#4-1 (T1) | 3/3013 (0.10%)        |
| RG#4-4 (T1) | 2/3162 (0.06%)        |

\*mutation efficiencies were calculated as mutation reads counts / total read counts.

**Figure S2. Off-target mutation frequencies in the *sliaa9* mutants.**

An off-target candidate sequence with 5 mismatches to the on-target sequence (chr6: 26946923–26946946) was analyzed to evaluate off-target effects in *sliaa9* mutants. The amplicon sequences were analyzed using MiSeq. Underlined; PAM, red; mismatching bases.

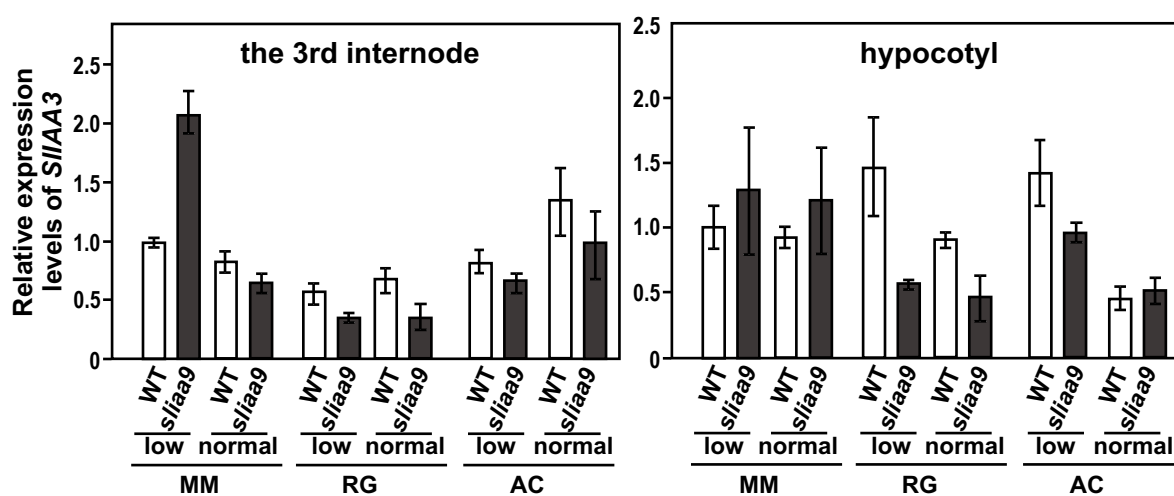

**Figure S3. Expression levels of the *SIIAA3* gene in the *sliaa9* mutants.**

The expression levels of *SIIAA3* were determined in the mutant tomato seedlings grown under low or normal light intensity. The relative expression levels were by normalized relative to those of a reference gene, *Slactin7-like*.

**A**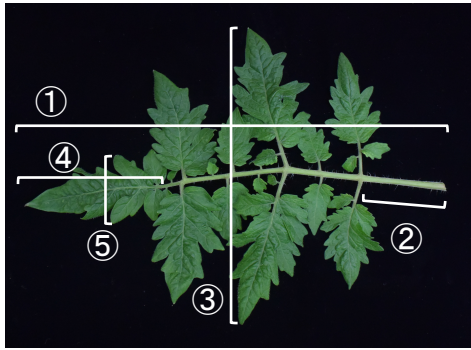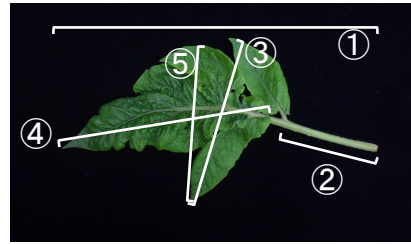**B**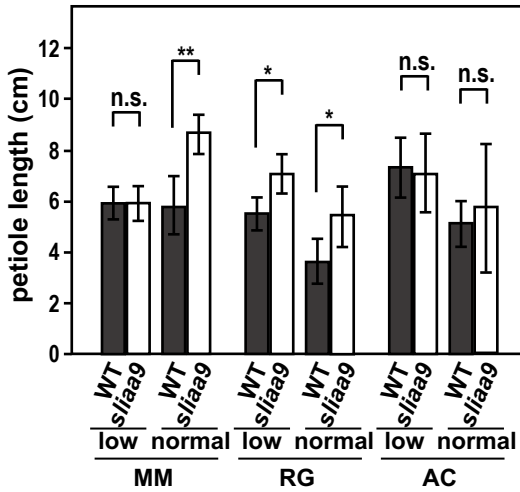**C**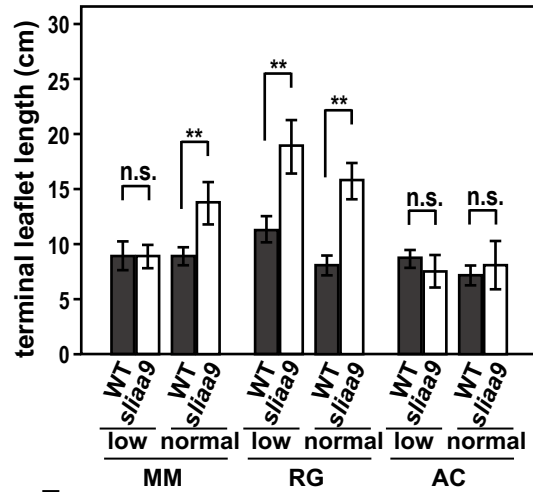**D**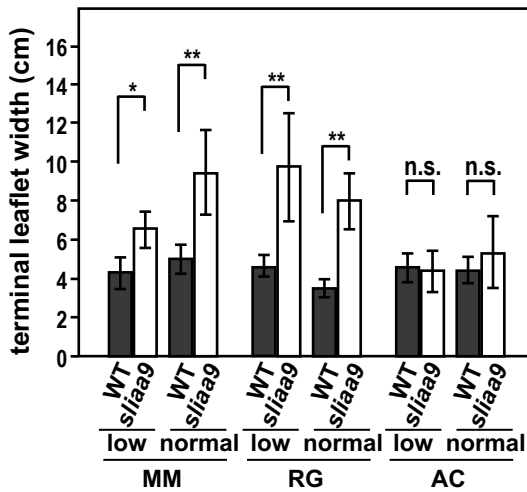**E**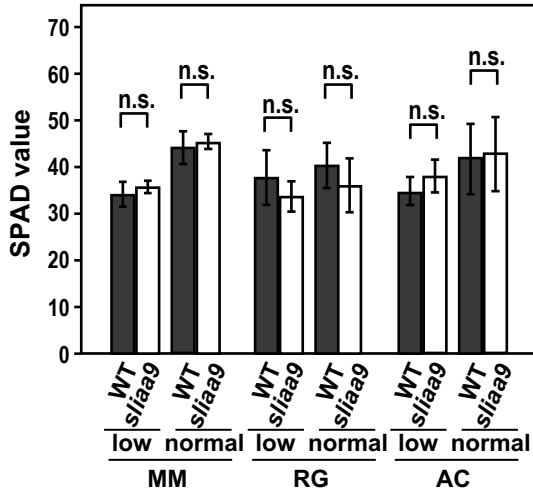**Figure S4. Measurement of leaf parts.**

(A) Wild-type (left) and the *sliaa9* mutant (right) tomato leaves and the positions of various parameter of the leaves. ①; leaflet length, ②; petiole length, ③; leaf width, ④; terminal leaflet length, ⑤; terminal leaflet width.

(B-D) Petiole length (B), terminal leaflet length (C), and terminal leaflet width (D) were measured in leaves of *sliaa9* mutants and the wild type. The fifth to tenth fully expanded leaves of the mature plants were measured at 48 days after germination. Data are means  $\pm$  S.D. of 2 – 5 leaves of individual T2 plant line (total 2 – 4 lines) ( $n = 6 - 10$ ). n.s.; not significant.

(E) SPAD values of the *sliaa9* mutant and wild-type leaves. Data are means  $\pm$  S.D. of independent plants ( $n = 20 - 30$ ). \* $P < 0.01$ , and \*\* $P < 0.001$  are determined by Student's *t* tests. n.s.; not significant.

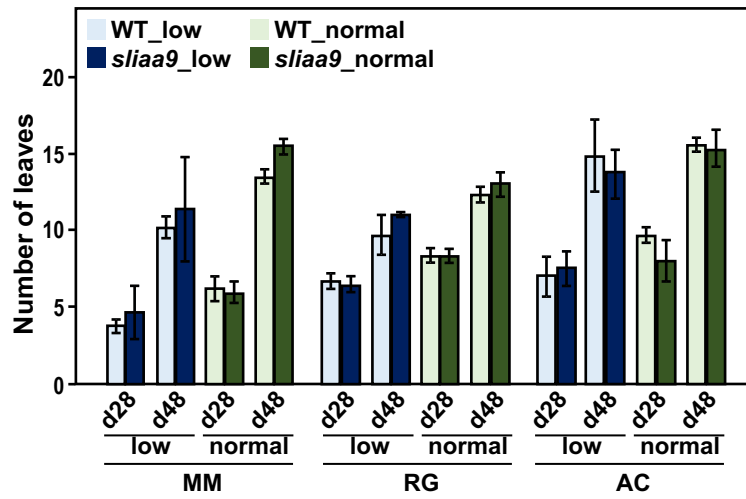

**Figure S5. Leaf numbers of *sliaa9* mutants and wild-type during growth under different conditions.**

Leaf numbers were measured in the *sliaa9* mutants and wild-type plants grown under low light and normal light conditions at 28 and 48 day after germination. Data are means  $\pm$  S.D. of independent plants ( $n = 3-6$ ).
